# Supplementary material for: Computer-aided Diagnosis of Psychiatric Distress in Children and Adolescents Using deep Interaction Networks:&nbsp;The CASPIAN-IV Study
Source: Research Square preprint supplement (doi:10.21203/rs.3.rs-116564/v1), 2020-12-09
Supplement: Supplementary file 1 [file b6a0b95846372e9cfc86a298.docx]

**Supplementary Table S2**. The performance measures of the computer-aided diagnosis system

|  |  |  |
| --- | --- | --- |
|  |  |  |
|  |  |  |
|  |  |  |
|  |  |  |

TP: True Positive; FN: False Negative; FP: False Positive; TN: True Negative; Se: sensitivity; Rl: recall; Sp: specificity; FA: false alarm; Acc: accuracy; Pr: precision; F1S: F1-Score; AUC: area under the receiver operating characteristic (ROC) curve; LR: likelihood ratio; DOR: diagnosis odds ratio; MCC: Matthews correlation coefficient; DP: discriminant power; K(C): Cohen's kappa coefficient; NPV: Negative Predictive Value.
