# Supplementary material for: Computer-aided Diagnosis of Psychiatric Distress in Children and Adolescents Using deep Interaction Networks:&nbsp;The CASPIAN-IV Study
Source: Research Square preprint supplement (doi:10.21203/rs.3.rs-116564/v1), 2020-12-09
Supplement: Supplementary file 2 [file c92a13f02965d9ca75c53556.docx]

**Computer-aided diagnosis of psychiatric distress in children and adolescents using deep interaction networks: the CASPIAN-IV Study**

Hamid Reza Marateb1,2, Zahra Tasdighi3¶, Mohammad Reza Mohebian4¶, Azam Naghavi5¶, Moritz Hess6, Mohammad Esmaiel Motlagh7, Ramin Heshmat8, Marjan Mansourian9,10,*, Miguel Angel Mananas11,12, Harald Binder13, and Roya Kelishadi14,*

1Biomedical Engineering Department, Engineering Faculty, University of Isfahan, 81746-73441 Isfahan, Iran; email: [h.marateb@eng.ui.ac.ir](mailto:h.marateb@eng.ui.ac.ir)

2Biomedical Engineering Research Centre (CREB), Automatic Control Department (ESAII), Universitat Politècnica de Catalunya-Barcelona Tech (UPC), Barcelona, 08028 Spain; email: [hamid.reza.marateb@upc.edu](mailto:hamid.reza.marateb@upc.edu)

3Epidemiology and Biostatistics Department, Health School, Isfahan University of Medical Sciences, 81746-73461 Isfahan, Iran; email: [zahraa.tasdighi@gmail.com](mailto:zahraa.tasdighi@gmail.com)

4Department of Electrical and Computer Engineering, University of Saskatchewan, S7N 5A9 Saskatoon, SK, Canada; email: [mom158@usask.ca](mailto:mom158@usask.ca)

5Department of Counseling, Faculty of Education and Psychology, University of Isfahan, Azadi Sq, Isfahan 8174673441, Iran; email: [az.naghavi@edu.ui.ac.ir](mailto:az.naghavi@edu.ui.ac.ir)

6Institute of Medical Biometry and Statistics, Faculty of Medicine and Medical Center – University of Freiburg, 79104 Freiburg, Germany; email: [hess@imbi.uni-freiburg.de](mailto:hess@imbi.uni-freiburg.de)

7Department of Pediatrics, Ahvaz Jundishapur University of Medical Sciences, 61357-15794 Ahvaz, Iran; email: [memotlagh@ajums.ac.ir](mailto:memotlagh@ajums.ac.ir) , [dr.motlagh.ms@gmail.com](mailto:dr.motlagh.ms@gmail.com)

8Chronic Diseases Research Center, Endocrinology and Metabolism Population Sciences Institute, Tehran University of Medical Sciences, Tehran, Iran; email: [rheshmat@tums.ac.ir](mailto:rheshmat@tums.ac.ir)

9Biomedical Engineering Research Centre (CREB), Automatic Control Department (ESAII), Universitat Politècnica de Catalunya-Barcelona Tech (UPC), Barcelona, 08028 Spain; email: [marjan.mansourian@upc.edu](mailto:marjan.mansourian@upc.edu)

10Pediatric Cardiovascular Research Center, Isfahan Cardiovascular Research Institute, Isfahan university of medical sciences, 81746-73461 Isfahan, Iran; email: [j_mansourian@hlth.mui.ac.ir](mailto:j_mansourian@hlth.mui.ac.ir)

11Biomedical Engineering Research Centre (CREB), Automatic Control Department (ESAII), Universitat Politècnica de Catalunya-Barcelona Tech (UPC), Barcelona, 08028 Spain; email: [miguel.angel.mananas@upc.edu](mailto:miguel.angel.mananas@upc.edu)

12Biomedical Research Networking Center in Bioengineering, Biomaterials, and Nanomedicine (CIBER-BBN), 28029 Madrid, Spain.

13Institute of Medical Biometry and Statistics, Faculty of Medicine and Medical Center – University of Freiburg, 79104 Freiburg, Germany; email: [binderh@imbi.uni-freiburg.de](mailto:binderh@imbi.uni-freiburg.de)

14Child Department of Pediatrics, Child Growth and Development Research Center, Research Institute for Primordial Prevention of Non-communicable Disease, Isfahan University of Medical Sciences, Isfahan, Iran; email: [kelishadi@med.mui.ac.ir](mailto:kelishadi@med.mui.ac.ir)

¶These authors equally contributed to the work.

*: Correspondence

Biomedical Engineering Research Center (CREB), Building H, Floor 4, Av. Diagonal 647, 08028 Barcelona, Spain.

Phone: +34 (658) 085-138

Fax: +34 (93) 401-1676

**Supplementary Table S1**. List of questions related to psychiatric problems based on the Global School-based student Health Survey (GSHS) questionnaire.

| Question No. | Psychiatric problems | Responses(scoring) |
| --- | --- | --- |
| 1 | Worthless: During the past 6 months, how often did you have this problem? | 1. Approximately every day (considered as yes)  2. More than once per week (considered as yes)  3. Approximately every week (considered as yes)  4. Approximately every month (considered as no)  5. Rarely or never (considered as no) |
| 2 | Angriness: During the past 6 months, how often did you have this problem? | 1. Approximately every day (considered as yes)  2. More than once per week (considered as yes)  3. Approximately every week (considered as yes)  4. Approximately every month (considered as no)  5. Rarely or never (considered as no) |
| 3 | Anxious: During the past 6 months, how often did you have this problem? | 1. Approximately every day (considered as yes)  2. More than once per week (considered as yes)  3. Approximately every week (considered as yes)  4. Approximately every month (considered as no)  5. Rarely or never (considered as no) |
| 4 | Insomnia: During the past 6 months, how often did you have this problem? | 1. Approximately every day (considered as yes)  2. More than once per week (considered as yes)  3. Approximately every week (considered as yes)  4. Approximately every month (considered as no)  5. Rarely or never (considered as no) |
| 5 | Confusion: During the past 6 months, how often did you have this problem? | 1. Approximately every day (considered as yes)  2. More than once per week (considered as yes)  3. Approximately every week (considered as yes)  4. Approximately every month (considered as no)  5. Rarely or never (considered as no) |
| 6 | Depression: During the past 12 months, did you ever feel so sad or hopeless almost every day for 2 weeks or more in a row that you stopped doing your usual activities? | 1.Yes 2. No |
| 7 | Worried: During the past 12 months, how often have you been so worried about something that you could not sleep at night? | 1.Never (considered as no)  2. Rarely (considered as no)  3. Sometimes (considered as no)  4. Mostly (considered as yes)  5. Always (considered as yes) |

**Supplementary Table S2**. The performance measures of the computer-aided diagnosis system

|  |  |  |
| --- | --- | --- |
|  |  |  |
|  |  |  |
|  |  |  |
|  |  |  |

TP: True Positive; FN: False Negative; FP: False Positive; TN: True Negative; Se: sensitivity; Rl: recall; Sp: specificity; FA: false alarm; Acc: accuracy; Pr: precision; F1S: F1-Score; AUC: area under the receiver operating characteristic (ROC) curve; LR: likelihood ratio; DOR: diagnosis odds ratio; MCC: Matthews correlation coefficient; DP: discriminant power; K(C): Cohen's kappa coefficient; NPV: Negative Predictive Value.

**Supplementary Table S3.** The interpretation of the reference intervals of the performance indices used in this study.

| Performance Index | Property | The interpretation of the reference intervals |
| --- | --- | --- |
| AUC ROC | Balanced diagnosis accuracy | [0.7,0.8) good  [0.8,0.9) very good  [0.9,1.0] excellent |
| Kappa | Class labeling agreement rate | <0.40 poor  [0.40,0.75) fair to good  [0.75,1.00] excellent |
| MCC | Correlation between predicted and observed class labels | [0.0, 0.3) negligible  [0.3, 0.5) low  [0.5, 0.7) moderate  [0.7, 0.9) high  [0.9, 1.0] very high  (-1.0,0.0) negative (i.e. disagreement) |
| DP | Discriminant power | <1 poor  [1,2) limited  [2,3) fair  3 good |

AUC ROC: area under the receiver operating characteristic curve; Kappa: Cohen's kappa coefficient; MCC: Matthews correlation coefficient; DP: discriminant power.
