# Supplementary material for: Computer-aided Diagnosis of Psychiatric Distress in Children and Adolescents Using deep Interaction Networks:&nbsp;The CASPIAN-IV Study
Source: Research Square preprint supplement (doi:10.21203/rs.3.rs-116564/v1), 2020-12-09
Supplement: Supplementary file 3 [file f8936499a2575a62bc1bee3a.docx]

**Supplementary Table S1**. List of questions related to psychiatric problems based on the Global School-based student Health Survey (GSHS) questionnaire.

| Question No. | Psychiatric problems | Responses(scoring) |
| --- | --- | --- |
| 1 | Worthless: During the past 6 months, how often did you have this problem? | 1. Approximately every day (considered as yes)  2. More than once per week (considered as yes)  3. Approximately every week (considered as yes)  4. Approximately every month (considered as no)  5. Rarely or never (considered as no) |
| 2 | Angriness: During the past 6 months, how often did you have this problem? | 1. Approximately every day (considered as yes)  2. More than once per week (considered as yes)  3. Approximately every week (considered as yes)  4. Approximately every month (considered as no)  5. Rarely or never (considered as no) |
| 3 | Anxious: During the past 6 months, how often did you have this problem? | 1. Approximately every day (considered as yes)  2. More than once per week (considered as yes)  3. Approximately every week (considered as yes)  4. Approximately every month (considered as no)  5. Rarely or never (considered as no) |
| 4 | Insomnia: During the past 6 months, how often did you have this problem? | 1. Approximately every day (considered as yes)  2. More than once per week (considered as yes)  3. Approximately every week (considered as yes)  4. Approximately every month (considered as no)  5. Rarely or never (considered as no) |
| 5 | Confusion: During the past 6 months, how often did you have this problem? | 1. Approximately every day (considered as yes)  2. More than once per week (considered as yes)  3. Approximately every week (considered as yes)  4. Approximately every month (considered as no)  5. Rarely or never (considered as no) |
| 6 | Depression: During the past 12 months, did you ever feel so sad or hopeless almost every day for 2 weeks or more in a row that you stopped doing your usual activities? | 1.Yes 2. No |
| 7 | Worried: During the past 12 months, how often have you been so worried about something that you could not sleep at night? | 1.Never (considered as no)  2. Rarely (considered as no)  3. Sometimes (considered as no)  4. Mostly (considered as yes)  5. Always (considered as yes) |
